# Supplementary material for: Central Taurine Attenuates Hyperthermia and Isolation Stress Behaviors Augmented by Corticotropin-Releasing Factor with Modifying Brain Amino Acid Metabolism in Neonatal Chicks
Source: MDPI journal article supplement (doi:10.3390/metabo12010083), 2022-01-16
Supplement: s1 [file s1]

**Table S1.** Effect of an intracerebroventricular injection of taurine or CRF on amino acid concentrations in the diencephalon of chicks exposed to social isolation stress.

| Free amino acids                | Saline      | Taurine     | CRF         | Taurine + CRF | P value |         |               |  |  |  |
|---------------------------------|-------------|-------------|-------------|---------------|---------|---------|---------------|--|--|--|
|                                 |             |             |             |               | Taurine | CRF     | Taurine × CRF |  |  |  |
| <i>Essential amino acids</i>    |             |             |             |               |         |         |               |  |  |  |
| Arginine                        | 283 ± 15    | 255 ± 11    | 271 ± 18    | 282 ± 11      | NS      | NS      | NS            |  |  |  |
| Glycine                         | 1448 ± 28   | 1486 ± 38   | 1504 ± 33   | 1458 ± 22     | NS      | NS      | NS            |  |  |  |
| Histidine                       | 181 ± 6     | 185 ± 6     | 177 ± 6     | 185 ± 10      | NS      | NS      | NS            |  |  |  |
| Methionine                      | 262 ± 43    | 199 ± 34    | 260 ± 40    | 229 ± 48      | NS      | NS      | NS            |  |  |  |
| Phenylalanine                   | 106 ± 7     | 108 ± 13    | 105 ± 8     | 95 ± 7        | NS      | NS      | NS            |  |  |  |
| Threonine                       | 651 ± 13    | 653 ± 45    | 675 ± 30    | 601 ± 29      | NS      | NS      | NS            |  |  |  |
| Tryptophan                      | 35 ± 2      | 38 ± 7      | 36 ± 2      | 31 ± 3        | NS      | NS      | NS            |  |  |  |
| Valine                          | 187 ± 9     | 179 ± 7     | 163 ± 7     | 165 ± 7       | NS      | P<0.05  | NS            |  |  |  |
| <i>Nonessential amino acids</i> |             |             |             |               |         |         |               |  |  |  |
| α-Aminoadipic acid              | 314 ± 9     | 312 ± 7     | 317 ± 7     | 300 ± 7       | NS      | NS      | NS            |  |  |  |
| Aspartic acid                   | 2770 ± 21   | 2776 ± 39   | 2693 ± 25   | 2625 ± 49     | NS      | P<0.005 | NS            |  |  |  |
| Citrulline                      | 319 ± 13    | 318 ± 10    | 314 ± 9     | 298 ± 12      | NS      | NS      | NS            |  |  |  |
| Cysteine                        | 131 ± 11    | 121 ± 7     | 126 ± 8     | 118 ± 5       | NS      | NS      | NS            |  |  |  |
| GABA                            | 5308 ± 91   | 5287 ± 109  | 5167 ± 71   | 5195 ± 82     | NS      | NS      | NS            |  |  |  |
| Glutamine                       | 12276 ± 251 | 11399 ± 284 | 11859 ± 237 | 11932 ± 223   | NS      | NS      | NS            |  |  |  |
| Hydroxyproline                  | 137 ± 8     | 119 ± 3     | 139 ± 8     | 142 ± 9       | NS      | NS      | NS            |  |  |  |
| 1-Methylhistidine               | 601 ± 67    | 514 ± 42    | 548 ± 52    | 470 ± 28      | NS      | NS      | NS            |  |  |  |
| Ornithine                       | 33 ± 1      | 37 ± 6      | 32 ± 3      | 29 ± 2        | NS      | NS      | NS            |  |  |  |
| Proline                         | 371 ± 19    | 337 ± 13    | 352 ± 20    | 329 ± 11      | NS      | NS      | NS            |  |  |  |
| Serine                          | 949 ± 19    | 897 ± 33    | 950 ± 18    | 933 ± 32      | NS      | NS      | NS            |  |  |  |

The number of chicks used in each group was 7–9. Values are means ± S.E.M. Values are means ± SEM in pmol/mg wet tissue. GABA, γ-amino butyric acid; NS, not significant; CRF, corticotropin-releasing factor.

**Table S2.** Effect of an intracerebroventricular injection of taurine or CRF on amino acid concentrations in the brain stem of chicks exposed to social isolation stress.

| Free amino acids                | Saline |   |     | Taurine |   |     | CRF  |   |     | Taurine + CRF |   |     | P value |        |               |
|---------------------------------|--------|---|-----|---------|---|-----|------|---|-----|---------------|---|-----|---------|--------|---------------|
|                                 |        |   |     |         |   |     |      |   |     |               |   |     | Taurine | CRF    | Taurine × CRF |
| <i>Essential amino acids</i>    |        |   |     |         |   |     |      |   |     |               |   |     |         |        |               |
| Arginine                        | 294    | ± | 20  | 273     | ± | 14  | 275  | ± | 22  | 309           | ± | 6   | NS      | NS     | NS            |
| Histidine                       | 141    | ± | 7   | 149     | ± | 5   | 149  | ± | 5   | 160           | ± | 10  | NS      | NS     | NS            |
| Leucine                         | 166    | ± | 6   | 163     | ± | 4   | 163  | ± | 6   | 161           | ± | 5   | NS      | NS     | NS            |
| Methionine                      | 334    | ± | 68  | 309     | ± | 57  | 294  | ± | 63  | 320           | ± | 70  | NS      | NS     | NS            |
| Threonine                       | 567    | ± | 20  | 630     | ± | 33  | 616  | ± | 32  | 611           | ± | 37  | NS      | NS     | NS            |
| Tryptophan                      | 13     | ± | 1   | 20      | ± | 6   | 22   | ± | 7   | 30            | ± | 14  | NS      | NS     | NS            |
| Valine                          | 170    | ± | 6   | 170     | ± | 4   | 156  | ± | 3   | 155           | ± | 8   | NS      | P<0.05 | NS            |
| <i>Nonessential amino acids</i> |        |   |     |         |   |     |      |   |     |               |   |     |         |        |               |
| Alanine                         | 781    | ± | 13  | 821     | ± | 22  | 810  | ± | 19  | 775           | ± | 21  | NS      | NS     | NS            |
| β-Alanine                       | 246    | ± | 7   | 230     | ± | 8   | 236  | ± | 12  | 246           | ± | 10  | NS      | NS     | NS            |
| α-Aminoadipic acid              | 347    | ± | 9   | 319     | ± | 17  | 321  | ± | 17  | 354           | ± | 12  | NS      | NS     | P<0.05        |
| Asparagine                      | 320    | ± | 14  | 313     | ± | 11  | 317  | ± | 12  | 323           | ± | 13  | NS      | NS     | NS            |
| Aspartic acid                   | 2654   | ± | 56  | 2709    | ± | 30  | 2644 | ± | 33  | 2651          | ± | 59  | NS      | NS     | NS            |
| Citrulline                      | 284    | ± | 19  | 295     | ± | 14  | 304  | ± | 23  | 325           | ± | 18  | NS      | NS     | NS            |
| Cystathionine                   | 29     | ± | 8   | 38      | ± | 6   | 41   | ± | 7   | 40            | ± | 8   | NS      | NS     | NS            |
| GABA                            | 3057   | ± | 75  | 3012    | ± | 106 | 3080 | ± | 69  | 3017          | ± | 80  | NS      | NS     | NS            |
| Glutamic acid                   | 5880   | ± | 46  | 5749    | ± | 107 | 5920 | ± | 133 | 5885          | ± | 82  | NS      | NS     | NS            |
| Glutamine                       | 10230  | ± | 940 | 9765    | ± | 760 | 9498 | ± | 746 | 8858          | ± | 733 | NS      | NS     | NS            |
| Hydroxyproline                  | 138    | ± | 7   | 128     | ± | 4   | 140  | ± | 7   | 149           | ± | 8   | NS      | NS     | NS            |
| 1-Methylhistidine               | 440    | ± | 32  | 409     | ± | 21  | 388  | ± | 27  | 438           | ± | 26  | NS      | NS     | NS            |
| 3-Methylhistidine               | 787    | ± | 158 | 487     | ± | 48  | 538  | ± | 71  | 622           | ± | 72  | NS      | NS     | NS            |
| Ornithine                       | 20     | ± | 2   | 21      | ± | 3   | 25   | ± | 5   | 15            | ± | 2   | NS      | NS     | NS            |
| Proline                         | 231    | ± | 20  | 249     | ± | 13  | 268  | ± | 23  | 264           | ± | 21  | NS      | NS     | NS            |
| Serine                          | 778    | ± | 11  | 782     | ± | 24  | 826  | ± | 29  | 815           | ± | 14  | NS      | NS     | NS            |

The number of chicks used in each group was 7–9. Values are means ± S.E.M. Values are means ± SEM in pmol/mg wet tissue. GABA, γ-amino butyric acid; NS; not significant; CRF, corticotropin-releasing factor.
